# Supplementary material for: Auditory Categorization of Man-Made Sounds Versus Natural Sounds by Means of MEG Functional Brain Connectivity
Source: Front Neurosci. 2019 Oct 4;13:1052. doi: 10.3389/fnins.2019.01052 (PMC6787283; doi:10.3389/fnins.2019.01052)
Supplement: Supplementary file 1 [file Data_Sheet_1.ZIP]

Archive with 148 entries (144 files):
- Final Sounds/
- Final Sounds/artificial/
- Final Sounds/artificial/sound1.wav
- Final Sounds/artificial/sound10.wav
- Final Sounds/artificial/sound11.wav
- Final Sounds/artificial/sound12.wav
- Final Sounds/artificial/sound13.wav
- Final Sounds/artificial/sound14.wav
- Final Sounds/artificial/sound15.wav
- Final Sounds/artificial/sound16.wav
- Final Sounds/artificial/sound17.wav
- Final Sounds/artificial/sound18.wav
- Final Sounds/artificial/sound19.wav
- Final Sounds/artificial/sound2.wav
- Final Sounds/artificial/sound20.wav
- Final Sounds/artificial/sound21.wav
- Final Sounds/artificial/sound22.wav
- Final Sounds/artificial/sound23.wav
- Final Sounds/artificial/sound24.wav
- Final Sounds/artificial/sound25.wav
- Final Sounds/artificial/sound26.wav
- Final Sounds/artificial/sound27.wav
- Final Sounds/artificial/sound28.wav
- Final Sounds/artificial/sound29.wav
- Final Sounds/artificial/sound3.wav
- Final Sounds/artificial/sound30.wav
- Final Sounds/artificial/sound31.wav
- Final Sounds/artificial/sound32.wav
- Final Sounds/artificial/sound33.wav
- Final Sounds/artificial/sound34.wav
- Final Sounds/artificial/sound35.wav
- Final Sounds/artificial/sound36.wav
- Final Sounds/artificial/sound37.wav
- Final Sounds/artificial/sound38.wav
- Final Sounds/artificial/sound39.wav
- Final Sounds/artificial/sound4.wav
- Final Sounds/artificial/sound40.wav
- Final Sounds/artificial/sound41.wav
- Final Sounds/artificial/sound42.wav
- Final Sounds/artificial/sound43.wav
- Final Sounds/artificial/sound44.wav
- Final Sounds/artificial/sound45.wav
- Final Sounds/artificial/sound46.wav
- Final Sounds/artificial/sound47.wav
- Final Sounds/artificial/sound48.wav
- Final Sounds/artificial/sound5.wav
- Final Sounds/artificial/sound6.wav
- Final Sounds/artificial/sound7.wav
- Final Sounds/artificial/sound8.wav
- Final Sounds/artificial/sound9.wav
- Final Sounds/musical/
- Final Sounds/musical/sound1.wav
- Final Sounds/musical/sound10.wav
- Final Sounds/musical/sound11.wav
- Final Sounds/musical/sound12.wav
- Final Sounds/musical/sound13.wav
- Final Sounds/musical/sound14.wav
- Final Sounds/musical/sound15.wav
- Final Sounds/musical/sound16.wav
- Final Sounds/musical/sound17.wav
- Final Sounds/musical/sound18.wav
- Final Sounds/musical/sound19.wav
- Final Sounds/musical/sound2.wav
- Final Sounds/musical/sound20.wav
- Final Sounds/musical/sound21.wav
- Final Sounds/musical/sound22.wav
- Final Sounds/musical/sound23.wav
- Final Sounds/musical/sound24.wav
- Final Sounds/musical/sound25.wav
- Final Sounds/musical/sound26.wav
- Final Sounds/musical/sound27.wav
- Final Sounds/musical/sound28.wav
- Final Sounds/musical/sound29.wav
- Final Sounds/musical/sound3.wav
- Final Sounds/musical/sound30.wav
- Final Sounds/musical/sound31.wav
- Final Sounds/musical/sound32.wav
- Final Sounds/musical/sound33.wav
- Final Sounds/musical/sound34.wav
- Final Sounds/musical/sound35.wav
- Final Sounds/musical/sound36.wav
- Final Sounds/musical/sound37.wav
- Final Sounds/musical/sound38.wav
- Final Sounds/musical/sound39.wav
- Final Sounds/musical/sound4.wav
- Final Sounds/musical/sound40.wav
- Final Sounds/musical/sound41.wav
- Final Sounds/musical/sound42.wav
- Final Sounds/musical/sound43.wav
- Final Sounds/musical/sound44.wav
- Final Sounds/musical/sound45.wav
- Final Sounds/musical/sound46.wav
- Final Sounds/musical/sound47.wav
- Final Sounds/musical/sound48.wav
- Final Sounds/musical/sound5.wav
- Final Sounds/musical/sound6.wav
- Final Sounds/musical/sound7.wav
- Final Sounds/musical/sound8.wav
- Final Sounds/musical/sound9.wav
- Final Sounds/natural/
- Final Sounds/natural/sound1.wav
- Final Sounds/natural/sound10.wav
- Final Sounds/natural/sound11.wav
- Final Sounds/natural/sound12.wav
- Final Sounds/natural/sound13.wav
- Final Sounds/natural/sound14.wav
- Final Sounds/natural/sound15.wav
- Final Sounds/natural/sound16.wav
- Final Sounds/natural/sound17.wav
- Final Sounds/natural/sound18.wav
- Final Sounds/natural/sound19.wav
- Final Sounds/natural/sound2.wav
- Final Sounds/natural/sound20.wav
- Final Sounds/natural/sound21.wav
- Final Sounds/natural/sound22.wav
- Final Sounds/natural/sound23.wav
- Final Sounds/natural/sound24.wav
- Final Sounds/natural/sound25.wav
- Final Sounds/natural/sound26.wav
- Final Sounds/natural/sound27.wav
- Final Sounds/natural/sound28.wav
- Final Sounds/natural/sound29.wav
- Final Sounds/natural/sound3.wav
- Final Sounds/natural/sound30.wav
- Final Sounds/natural/sound31.wav
- Final Sounds/natural/sound32.wav
- Final Sounds/natural/sound33.wav
- Final Sounds/natural/sound34.wav
- Final Sounds/natural/sound35.wav
- Final Sounds/natural/sound36.wav
- Final Sounds/natural/sound37.wav
- Final Sounds/natural/sound38.wav
- Final Sounds/natural/sound39.wav
- Final Sounds/natural/sound4.wav
- Final Sounds/natural/sound40.wav
- Final Sounds/natural/sound41.wav
- Final Sounds/natural/sound42.wav
- Final Sounds/natural/sound43.wav
- Final Sounds/natural/sound44.wav
- Final Sounds/natural/sound45.wav
- Final Sounds/natural/sound46.wav
- Final Sounds/natural/sound47.wav
- Final Sounds/natural/sound48.wav
- Final Sounds/natural/sound5.wav
- Final Sounds/natural/sound6.wav
- Final Sounds/natural/sound7.wav
- Final Sounds/natural/sound8.wav
- Final Sounds/natural/sound9.wav
